# Supplementary material for: Cytosolic glutamine synthetase is important for photosynthetic efficiency and water use efficiency in potato as revealed by high-throughput sequencing QTL analysis
Source: PubMed Central journal article supplement (PMC4624824; doi:10.1007/s00122-015-2573-2), 2015-07-12

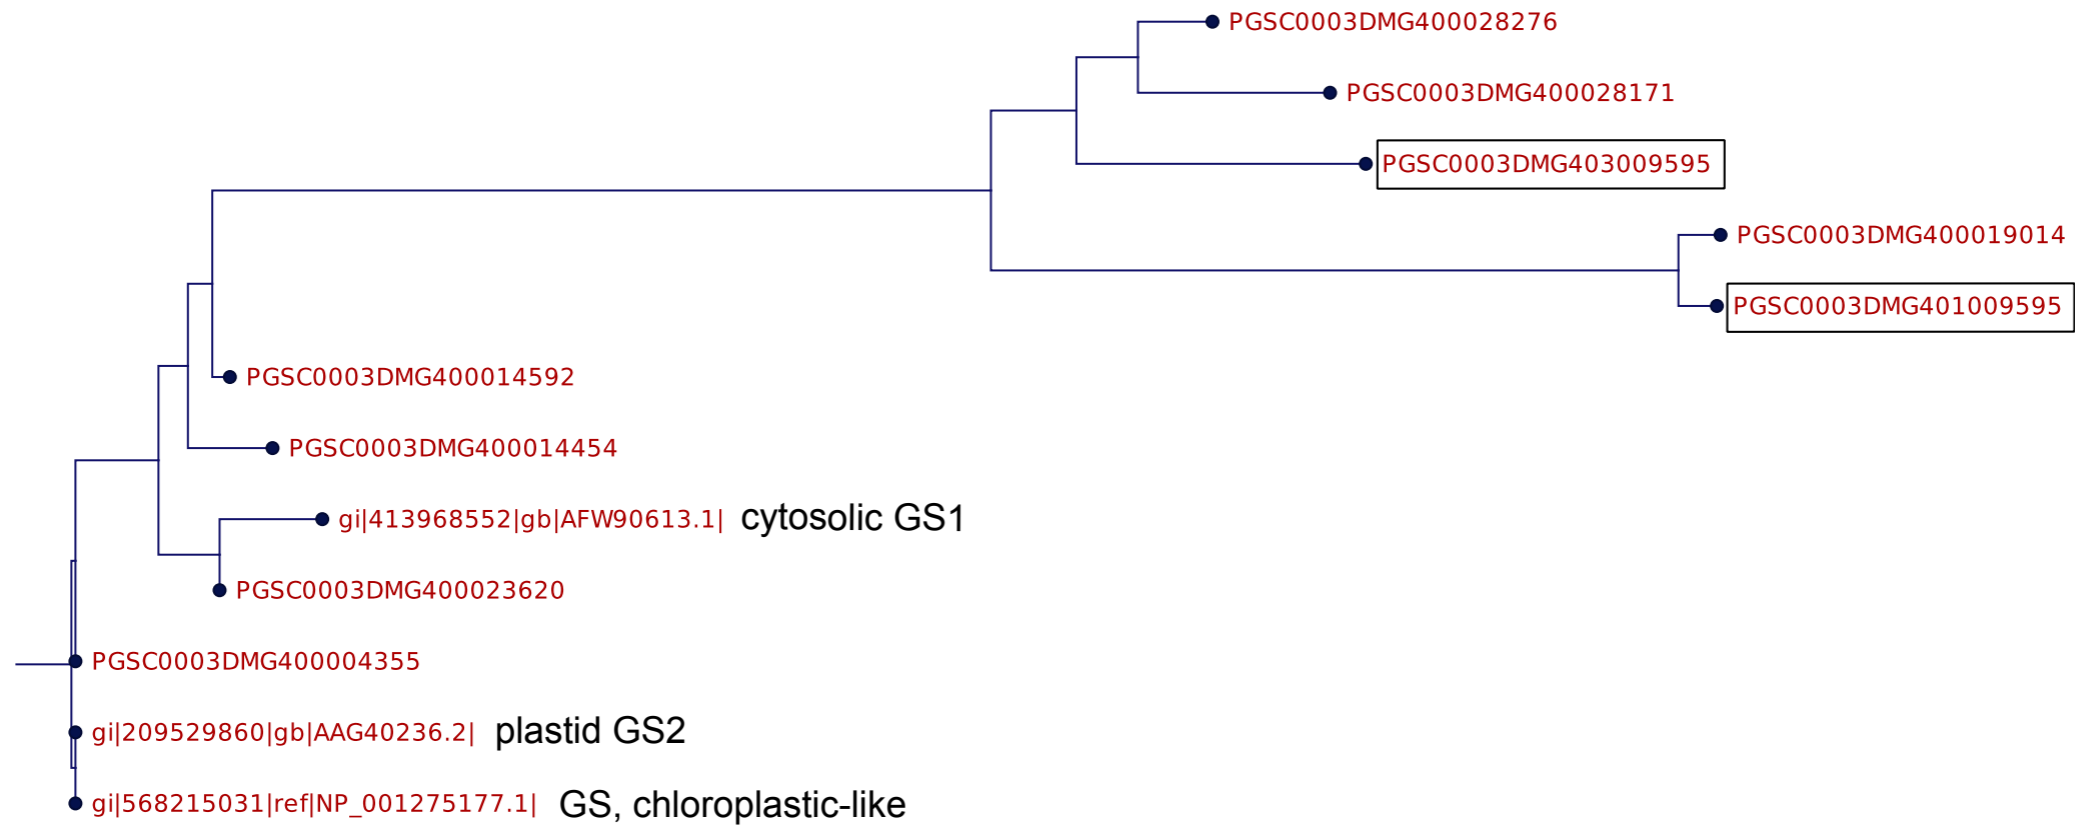

1.500

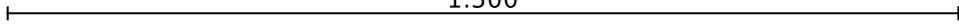

Supplement: 122_2015_2573_MOESM1_ESM.pdf [file 122_2015_2573_MOESM1_ESM.pdf]
